# Supplementary material
Source: PubMed Central journal article supplement (PMC4274202)
Supplement: NIHMS641541-supplement.pdf [file NIHMS641541-supplement.pdf]

## Supplemental Figure S1

|                  | Alpha Helix | Beta Sheet | Beta Turn | Random Coil |
|------------------|-------------|------------|-----------|-------------|
| <b>MMPA</b>      | 23.7%       | 25.7%      | 12.8%     | 37.8%       |
| <b>MMPeP</b>     | 9.1%        | 30.6%      | 15.3%     | 44.9%       |
| <b>Scrambled</b> | 19.9%       | 31.6%      | 11.1%     | 37.4%       |

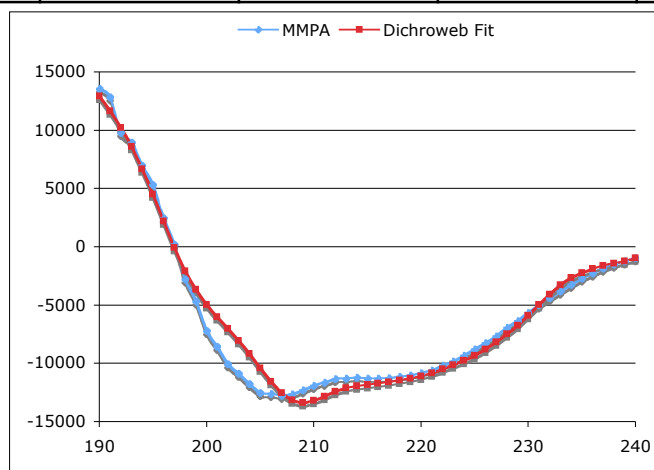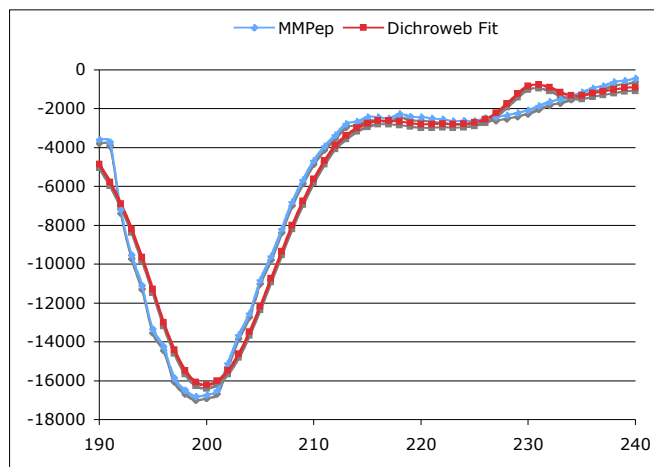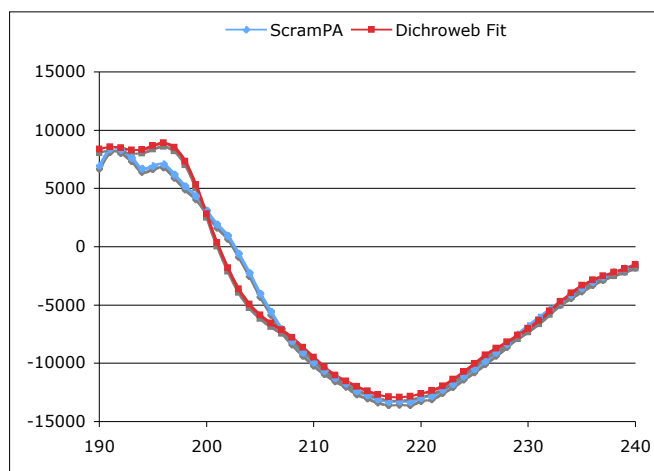

**Figure S1.** Summary of circular dichroism fits obtained for PAs and peptide using DichroWeb online analysis tool

## Supplemental Figure S2

C<sub>16</sub>VVAAGGEDESTGLEKIEKQLNK-(FITC)

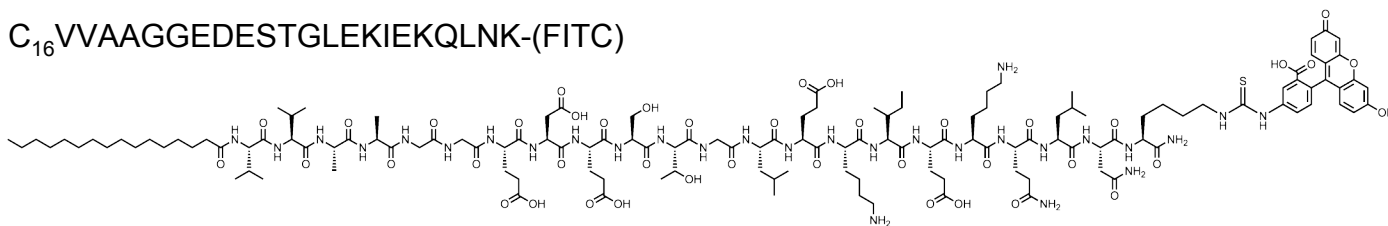

EDESTGLEKIEKQLN

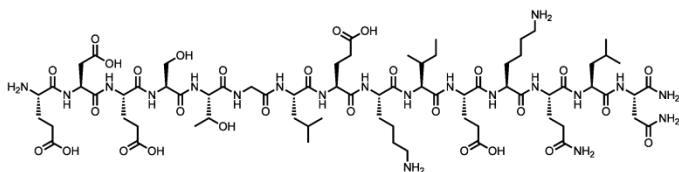

C<sub>16</sub>VVAAGGELQEKLDEITKGENS

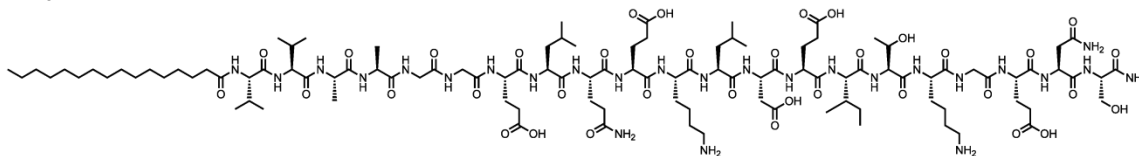

**Figure S2.** Chemical structure of FITC-labeled MMPA, as well as MMPep and ScramPA without FITC.

## Supplemental Figure S3

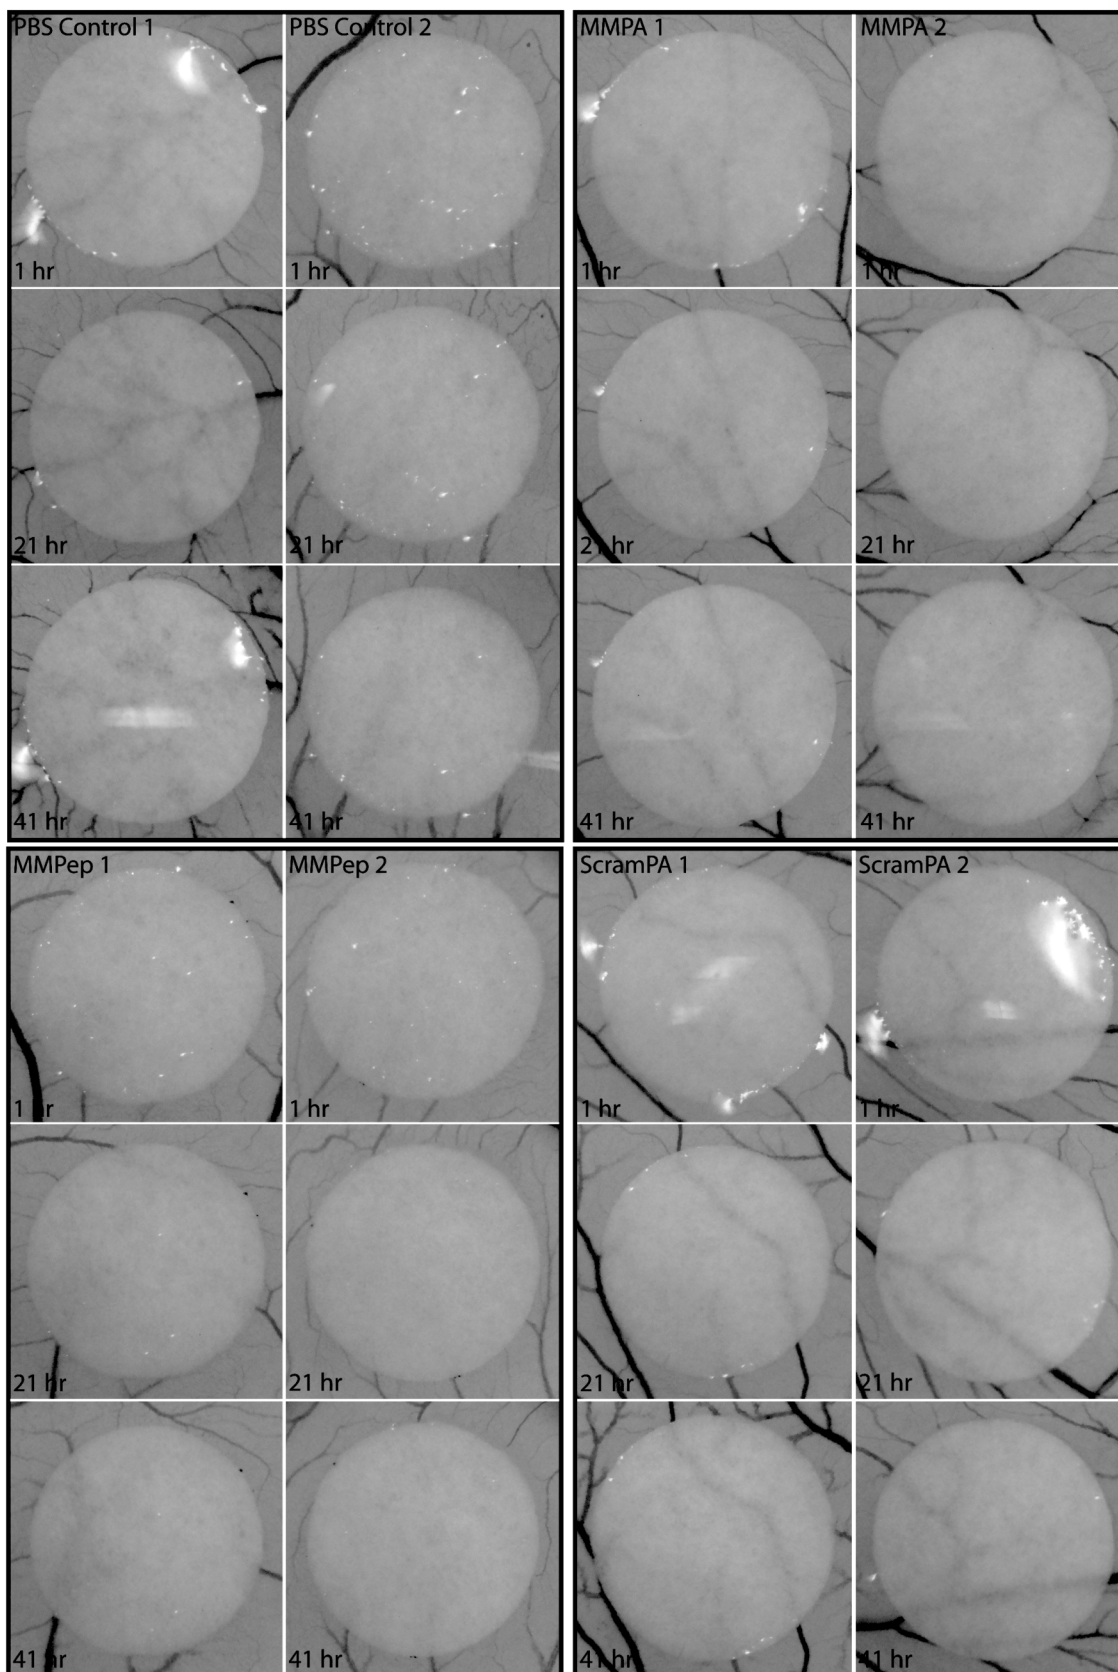

**Figure S3.** Supplementary representative CAM assay images.
